# Supplementary material
Source: publisher figshare collection journal article supplement (https://gsapubs.figshare.com/ndownloader/files/40838726)
Supplement: Supplementary file 1 [file 40838726]

## Sheet: Sheet1
	Table S5. Published detrital zircon U-Pb age data of the eastern Yanshan fold belt, northeastern Asia.
No.	Th (ppm)	U (ppm)	Th/U	Isotopic ratios						Age (Ma)
				207Pb/206Pb	1δ	207Pb/235U	1δ	206Pb/238U	1δ	207Pb/206Pb	1δ	207Pb/235U	1δ	206Pb/238U	1δ	Concordance
Fuxin Formation
1	48	68	0.72	0.05597	0.00554	0.20686	0.02089	0.0272	0.00092	451	217	191	18	173	6	110.405
2	264	453	0.58	0.15828	0.00474	10.0948	0.30603	0.45984	0.0122	2437	25	2443	28	2439	54	100.164
3	64	79	0.8	0.05041	0.00984	0.18413	0.03523	0.02649	0.00102	214	364	172	30	169	6	101.775
4	101	107	0.95	0.12728	0.00416	7.14626	0.23159	0.40534	0.01078	2061	33	2130	29	2194	49	97.083
5	123	169	0.73	0.16312	0.00497	11.3822	0.35118	0.5033	0.01367	2488	25	2555	29	2628	59	97.2222
6	17	44	0.4	0.16078	0.00551	10.7368	0.36945	0.48345	0.01357	2464	34	2501	32	2542	59	98.3871
7	91	146	0.62	0.16334	0.00512	10.9205	0.33674	0.48234	0.01286	2491	27	2516	29	2537	56	99.1723
8	46	107	0.43	0.04854	0.00601	0.17928	0.02128	0.02679	0.00094	126	257	167	18	170	6	98.2353
9	86	471	0.18	0.16083	0.00507	10.4173	0.32474	0.46705	0.01238	2464	28	2473	29	2471	54	100.081
10	315	330	0.95	0.04679	0.0056	0.12124	0.01398	0.01879	0.00061	39	238	116	13	120	4	96.6667
11	128	228	0.56	0.16252	0.00493	10.573	0.323	0.46996	0.01252	2482	26	2486	28	2483	55	100.121
12	121	280	0.43	0.16248	0.00483	10.7058	0.3253	0.47663	0.01298	2482	23	2498	28	2513	57	99.4031
13	78	92	0.84	0.16435	0.00511	10.7148	0.33105	0.47254	0.01261	2501	27	2499	29	2495	55	100.16
14	111	276	0.4	0.16484	0.00493	10.7436	0.31897	0.47253	0.01249	2506	23	2501	28	2495	55	100.24
15	100	386	0.26	0.15992	0.00487	9.80765	0.29578	0.445	0.0118	2455	25	2417	28	2373	53	101.854
16	37	250	0.15	0.1643	0.00515	11.1515	0.36875	0.49298	0.01423	2500	28	2536	31	2584	61	98.1424
17	73	129	0.56	0.17143	0.00543	12.236	0.39237	0.51795	0.01421	2572	28	2623	30	2690	60	97.5093
18	71	57	1.24	0.04843	0.00957	0.17177	0.03309	0.02572	0.00113	120	352	161	29	164	7	98.1707
19	110	236	0.46	0.05784	0.00321	0.35026	0.01896	0.04433	0.00127	524	103	305	14	280	8	108.929
20	48	73	0.66	0.09833	0.00363	3.87411	0.1396	0.28718	0.0082	1593	42	1608	29	1627	41	98.8322
21	112	217	0.52	0.16048	0.00495	10.7734	0.33093	0.48497	0.01301	2461	26	2504	29	2549	56	98.2346
22	471	827	0.57	0.04648	0.00424	0.19138	0.0166	0.02987	0.00085	22	199	178	14	190	5	93.6842
23	120	99	1.22	0.15941	0.00522	10.9242	0.36272	0.49376	0.0137	2449	32	2517	31	2587	59	97.2942
24	464	576	0.81	0.1667	0.00543	11.6246	0.38352	0.50121	0.01385	2525	31	2575	31	2619	59	98.32
25	94	95	0.99	0.04987	0.00535	0.18705	0.01944	0.02799	0.00099	189	223	174	17	178	6	97.7528
26	107	300	0.36	0.15517	0.00493	10.1013	0.31997	0.46755	0.01265	2404	29	2444	29	2473	56	98.8273
27	136	205	0.66	0.04863	0.00412	0.12973	0.01117	0.01914	0.00056	130	183	124	10	122	4	101.639
28	129	144	0.9	0.16026	0.00496	10.6965	0.3327	0.47939	0.01296	2458	27	2497	29	2525	56	98.8911
29	110	409	0.27	0.15358	0.00458	10.2846	0.30531	0.48067	0.01275	2386	23	2460	27	2530	56	97.2332
31	137	89	1.54	0.15284	0.00487	10.1137	0.32093	0.47627	0.0132	2378	27	2445	29	2511	58	97.3716
32	44	69	0.63	0.04605	0.02068	0.14176	0.0631	0.02233	0.00134	-	751	135	56	142	8	95.0704
33	112	238	0.47	0.15901	0.00487	10.8325	0.33078	0.4901	0.01322	2445	25	2509	28	2571	57	97.5885
34	272	447	0.61	0.04605	0.00321	0.11262	0.00713	0.01774	0.00052	-	154	108	7	113	3	95.5752
35	211	232	0.91	0.0513	0.00413	0.14086	0.01174	0.02017	0.00064	254	176	134	10	129	4	103.876
36	438	271	1.62	0.05432	0.00368	0.19456	0.01307	0.02601	0.00079	384	139	181	11	166	5	109.036
37	1151	1378	0.84	0.04792	0.00181	0.18058	0.00684	0.02724	0.00076	95	60	169	6	173	5	97.6879
38	592	1060	0.56	0.04952	0.00205	0.17927	0.00714	0.02626	0.00071	172	70	167	6	167	4	100
39	236	292	0.81	0.05389	0.00697	0.15807	0.01975	0.02127	0.00071	366	292	149	17	136	5	109.559
40	84	125	0.67	0.15294	0.00493	9.26143	0.30439	0.43793	0.01248	2379	29	2364	30	2341	56	100.982
41	31	250	0.12	0.12725	0.00435	6.38422	0.20468	0.36255	0.00975	2060	31	2030	28	1994	46	101.805
42	212	207	1.02	0.05187	0.00365	0.15642	0.01081	0.02219	0.00071	280	142	148	9	141	4	104.965
43	111	224	0.5	0.04647	0.0028	0.1983	0.01143	0.03138	0.00092	22	107	184	10	199	6	92.4623
44	95	284	0.33	0.15849	0.00488	10.0799	0.3056	0.45814	0.01222	2440	25	2442	28	2431	54	100.452
45	101	360	0.28	0.15603	0.00473	9.99268	0.30016	0.4608	0.01239	2413	23	2434	28	2443	55	99.6316
46	549	648	0.85	0.05139	0.00236	0.17308	0.00776	0.02442	0.00068	258	83	162	7	156	4	103.846
47	88	213	0.41	0.05117	0.00439	0.16406	0.01308	0.02325	0.00074	249	196	154	11	148	5	104.054
48	886	673	1.32	0.04988	0.00238	0.18475	0.00849	0.02679	0.00077	189	86	172	7	170	5	101.176
49	68	162	0.42	0.04615	0.00705	0.17391	0.02569	0.02733	0.00107	6	277	163	22	174	7	93.6782
50	220	247	0.89	0.04707	0.00323	0.12669	0.00828	0.01972	0.00059	53	128	121	7	126	4	96.0317
51	68	66	1.04	0.05585	0.00809	0.13204	0.0185	0.01788	0.00075	446	301	126	17	114	5	110.526
52	67	85	0.79	0.04605	0.00358	0.16838	0.01144	0.02652	0.001	-	173	158	10	169	6	93.4911
53	210	439	0.48	0.10903	0.00344	4.39732	0.1362	0.28883	0.00798	1783	26	1712	26	1636	40	104.645
54	71	151	0.47	0.0517	0.00413	0.20441	0.01594	0.02881	0.00095	272	163	189	13	183	6	103.279
55	19	31	0.62	0.05085	0.01347	0.17847	0.04615	0.02545	0.00146	234	472	167	40	162	9	103.086
56	92	79	1.17	0.05318	0.01216	0.12734	0.02849	0.01737	0.00082	336	434	122	26	111	5	109.91
57	99	81	1.23	0.04663	0.01257	0.11568	0.03066	0.01799	0.00088	30	443	111	28	115	6	96.5217
58	59	116	0.51	0.13259	0.00451	7.67981	0.26808	0.4129	0.01136	2132	38	2194	31	2228	52	98.474
59	391	341	1.15	0.05442	0.00338	0.1453	0.00879	0.01949	0.00059	388	121	138	8	124	4	111.29
60	63	76	0.83	0.0496	0.0066	0.16547	0.01969	0.02705	0.0011	176	251	155	17	172	7	90.1163
61	351	451	0.78	0.05211	0.00245	0.16133	0.00762	0.02247	0.00064	290	88	152	7	143	4	106.294
Sunjiawan Formation
2	69	142	0.49	0.04898	0.00633	0.09809	0.01233	0.01594	0.00058	147	255	95	11	102	4	93.1373
3	109	137	0.8	0.16175	0.00475	10.5969	0.33406	0.47249	0.01335	2474	24	2488	29	2494	58	99.7594
4	65	161	0.41	0.16161	0.00478	9.55576	0.28418	0.427	0.01134	2473	23	2393	27	2292	51	104.407
5	45	40	1.11	0.16419	0.00536	10.5329	0.33898	0.46541	0.01284	2499	29	2483	30	2463	56	100.812
6	167	213	0.78	0.04434	0.00381	0.10008	0.00838	0.0167	0.00051	-53	166	97	8	107	3	90.6542
7	88	118	0.75	0.15835	0.00481	9.77177	0.29928	0.44527	0.01187	2438	26	2413	28	2374	53	101.643
8	106	392	0.27	0.15937	0.00476	9.92525	0.29169	0.44945	0.01167	2449	24	2428	27	2393	52	101.463
10	117	145	0.81	0.15706	0.0047	9.52926	0.28352	0.4379	0.01149	2424	24	2390	27	2341	52	102.093
13	57	72	0.79	0.16742	0.00643	10.8369	0.36918	0.4705	0.01301	2532	34	2509	32	2486	57	100.925
15	50	52	0.96	0.16616	0.00555	10.3285	0.35028	0.45007	0.01278	2519	32	2465	31	2396	57	102.88
16	50	65	0.77	0.15641	0.00532	9.6179	0.30764	0.44424	0.01204	2417	30	2399	29	2370	54	101.224
17	67	102	0.66	0.16186	0.00503	9.53336	0.29351	0.42565	0.01159	2475	25	2391	28	2286	52	104.593
18	209	235	0.89	0.04996	0.00348	0.13152	0.00943	0.01918	0.00057	193	149	125	8	122	4	102.459
19	14	332	0.04	0.16348	0.0061	10.2307	0.28154	0.45387	0.01145	2492	64	2456	25	2412	51	101.824
20	928	1143	0.81	0.16472	0.00467	9.74761	0.28826	0.42603	0.01155	2505	20	2411	27	2288	52	105.376
21	78	261	0.3	0.16798	0.00489	10.1013	0.28985	0.43357	0.01126	2538	21	2444	27	2322	51	105.254
22	109	165	0.66	0.16422	0.00527	9.99032	0.29425	0.43864	0.01151	2500	23	2434	27	2345	52	103.795
23	38	32	1.18	0.17212	0.00624	11.5598	0.42871	0.48652	0.01428	2578	39	2569	35	2556	62	100.509
24	210	216	0.97	0.051	0.00609	0.16077	0.01847	0.02286	0.00074	241	269	151	16	146	5	103.425
25	48	56	0.87	0.16633	0.00547	10.407	0.33314	0.45295	0.0124	2521	29	2472	30	2408	55	102.658
29	74	298	0.25	0.04918	0.00266	0.15204	0.00793	0.0227	0.00065	156	101	144	7	145	4	99.3103
31	35	136	0.26	0.04771	0.00414	0.1507	0.01207	0.02387	0.00074	85	165	143	11	152	5	94.0789
32	41	113	0.36	0.16148	0.00496	10.4254	0.3171	0.46673	0.01232	2471	26	2473	28	2469	54	100.162
34	128	198	0.65	0.16296	0.00479	10.0595	0.28992	0.4463	0.01168	2487	21	2440	27	2379	52	102.564
35	159	233	0.68	0.16253	0.00467	10.108	0.2882	0.44895	0.01165	2482	20	2445	26	2391	52	102.258
38	334	461	0.72	0.16249	0.00474	9.74	0.28072	0.43251	0.01126	2482	21	2410	27	2317	51	104.014
39	64	61	1.06	0.16116	0.00511	10.5821	0.33534	0.47484	0.0131	2468	27	2487	29	2505	57	99.2814
40	166	615	0.27	0.15901	0.00481	8.59616	0.28033	0.38929	0.01124	2445	26	2296	30	2120	52	108.302
41	376	426	0.88	0.0489	0.00275	0.12551	0.007	0.0187	0.00053	143	109	120	6	119	3	100.84
44	22	249	0.09	0.15951	0.00525	10.308	0.29977	0.46669	0.01226	2450	22	2463	27	2469	54	99.757
45	54	42	1.28	0.1687	0.00548	10.6733	0.3579	0.45847	0.01298	2545	31	2495	31	2433	57	102.548
47	33	41	0.81	0.17013	0.00548	10.7991	0.35481	0.4593	0.01263	2559	31	2506	31	2436	56	102.874
49	40	32	1.23	0.16657	0.00554	10.1775	0.33049	0.44457	0.01253	2523	28	2451	30	2371	56	103.374
51	34	56	0.61	0.16354	0.00535	10.4788	0.31932	0.45262	0.01213	2493	25	2478	28	2407	54	102.95
52	70	140	0.5	0.04605	0.00523	0.14101	0.01537	0.02221	0.0007	-	225	134	14	142	4	94.3662
53	299	656	0.46	0.05425	0.00235	0.15846	0.00626	0.02127	0.00058	381	66	149	5	136	4	109.559
54	81	226	0.36	0.16214	0.00476	10.4661	0.3066	0.46497	0.01225	2478	22	2477	27	2461	54	100.65
55	148	276	0.54	0.16174	0.00484	9.46466	0.28128	0.42133	0.01111	2474	24	2384	27	2266	50	105.207
56	34	63	0.54	0.1621	0.00536	10.1276	0.33297	0.45111	0.01254	2478	30	2446	30	2400	56	101.917
57	96	125	0.76	0.16465	0.00516	11.0577	0.34112	0.48387	0.01294	2504	26	2528	29	2544	56	99.3711
60	115	221	0.52	0.16104	0.00473	9.10435	0.26375	0.40818	0.0108	2467	20	2349	27	2207	49	106.434
64	949	574	1.65	0.04819	0.00639	0.13383	0.01727	0.02014	0.00062	109	265	128	15	129	4	99.2248
65	76	81	0.94	0.04605	0.0055	0.1686	0.01919	0.02656	0.00096	-	237	158	17	169	6	93.4911
66	55	147	0.38	0.05495	0.00445	0.16264	0.01248	0.02172	0.00075	410	158	153	11	139	5	110.072
68	245	232	1.06	0.05254	0.00323	0.15768	0.00903	0.02243	0.00065	309	115	149	8	143	4	104.196
70	109	69	1.58	0.047	0.01481	0.11547	0.03597	0.01782	0.00086	49	517	111	33	114	5	97.3684
73	97	89	1.1	0.16379	0.00508	10.2127	0.3121	0.45019	0.01205	2495	25	2454	28	2396	54	102.421
76	173	180	0.96	0.04605	0.00459	0.11804	0.01112	0.01859	0.0006	-	209	113	10	119	4	94.958
81	91	94	0.96	0.0481	0.00529	0.1521	0.01638	0.02288	0.00087	104	225	144	14	146	5	98.6301
84	107	204	0.52	0.05658	0.00351	0.17729	0.00999	0.02339	0.0007	475	108	166	9	149	4	111.409
85	408	241	1.69	0.0527	0.00322	0.16261	0.00955	0.02249	0.00064	316	120	153	8	143	4	106.993
88	147	155	0.95	0.0552	0.00383	0.21044	0.01411	0.02869	0.00087	420	137	194	12	182	5	106.593
	Reference: Su, N., Zhu, G., Wu, X.D., Yin, H., Lu, Y.C., and Zhang, S., 2021a, Back-arc tectonic tempos: Records from Jurassic–Cretaceous basins in the eastern North China craton: Gondwana Research, v. 90, p. 241–257, https://doi.org/10.1016/j.gr.2020.12.002.
